# Supplementary material for: 2D conglomerate crystallization of heptahelicene
Source: Royal Society of Chemistry journal article supplement (doi:10.1039/c4cc03574g), 2014-01-01
Supplement: c4cc03574g1.pdf [file c4cc03574g1.pdf]

## Electronic Supplementary Information

### 2D conglomerate crystallization of heptahelicene

Johannes Seibel,<sup>a</sup> Laura Zoppi,<sup>b</sup> and Karl-Heinz Ernst<sup>\*a,b</sup>

<sup>a</sup> Nanoscale Materials Science, Empa, Swiss Federal Laboratories for Materials Science and Technology, Überlandstrasse 129, CH-8600 Dübendorf (Switzerland)

<sup>b</sup> Organic Chemistry Institute, University Zurich, Winterthurerstrasse 190, CH-8057 Zürich, (Switzerland)

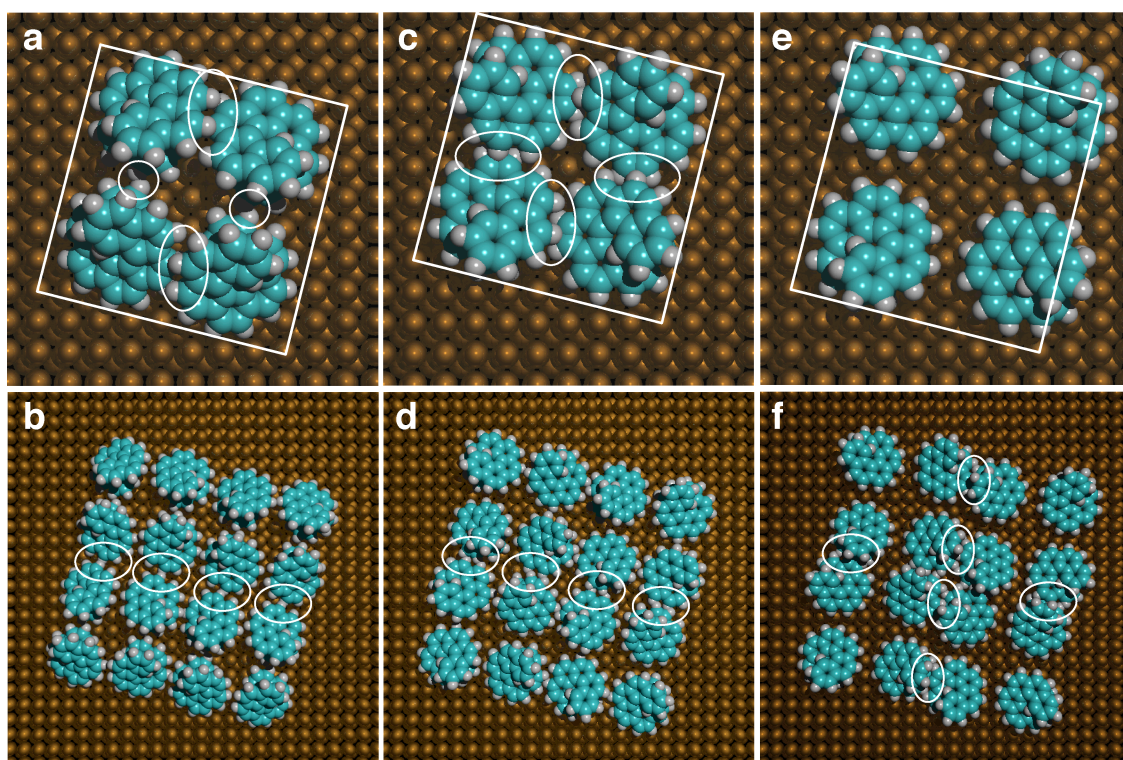

**Figure S1.** Packing models of *M/P* pairs and *M*-[7]H in a  $(8 -2, 2 8)$  unit cell. Neither identical adsites (a) or ignoring the substrate (b) allows close packing for *M/P* or for pure *M*-[7]H (c,d). Under the premise of identical sites, a different, less dense packing for *M*-[7]H does not allow an extended monolayer (e,f). The conflicts due to close packing are indicated by white ellipses.

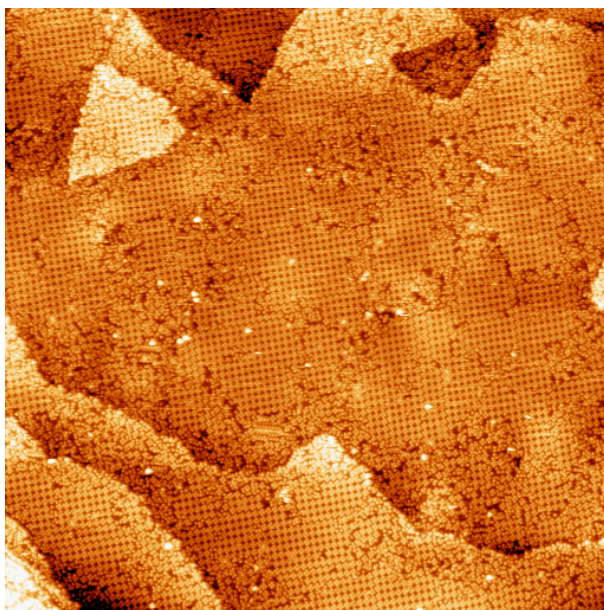

**Figure S2.** STM image (200 nm  $\times$  200 nm,  $U = +2.671$  V,  $I = 42$  pA) of *M*-[7]H adsorbed on Cu(100). Exclusively the (8 2, -2 8) enantiomorph is observed.
